# Supplementary material for: Transcriptome analysis identifies genes and co-expression networks underlying heat tolerance in pigs
Source: PubMed Central journal article supplement (PMC7171765; doi:10.1186/s12863-020-00852-4), 2020-04-21
Supplement: 12863_2020_852_MOESM1_ESM.pdf [file 12863_2020_852_MOESM1_ESM.pdf]

A

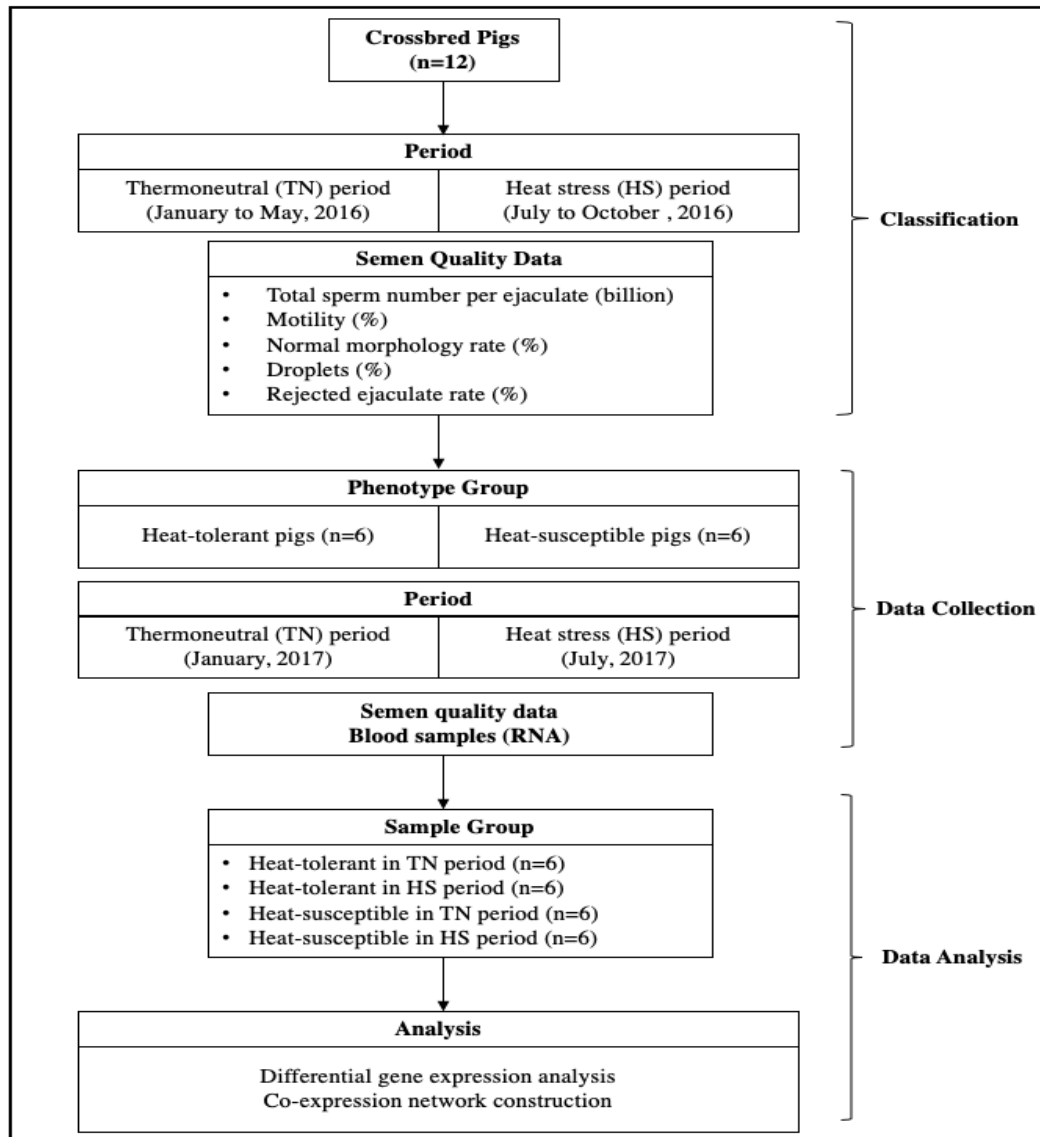

**B**

| <b>RNA-seq Analysis Pipeline</b>                                                                                                                                                                                                                                                                                                                                                                                                                                                                                                                                                                       |                                                                                                                                                                                                                                                                                                                                                                                                                                                                                                                                                                                                                                                                                                     |
|--------------------------------------------------------------------------------------------------------------------------------------------------------------------------------------------------------------------------------------------------------------------------------------------------------------------------------------------------------------------------------------------------------------------------------------------------------------------------------------------------------------------------------------------------------------------------------------------------------|-----------------------------------------------------------------------------------------------------------------------------------------------------------------------------------------------------------------------------------------------------------------------------------------------------------------------------------------------------------------------------------------------------------------------------------------------------------------------------------------------------------------------------------------------------------------------------------------------------------------------------------------------------------------------------------------------------|
| <p><b>Processes:</b></p> <ul style="list-style-type: none"> <li>• QC of Raw reads(.fastq)</li> <li>• Read Alignment (.bam)</li> <li>• Raw gene counts (.txt)</li> </ul>                                                                                                                                                                                                                                                                                                                                                                                                                                | <p><b>Tools:</b></p> <ul style="list-style-type: none"> <li>• FastQC (v.0.10.1)</li> <li>• TopHat2 (v.2.0.14)</li> <li>• featureCounts (v.1.6.3)</li> </ul>                                                                                                                                                                                                                                                                                                                                                                                                                                                                                                                                         |
| <b>Differential Gene Expression Analysis</b><br>(edgeR and Limma)                                                                                                                                                                                                                                                                                                                                                                                                                                                                                                                                      | <b>Co-expression Network Analysis</b><br>(edgeR and WGCNA)                                                                                                                                                                                                                                                                                                                                                                                                                                                                                                                                                                                                                                          |
| <p><b>Data Processing:</b></p> <ul style="list-style-type: none"> <li>• Raw count (genes = 25880)</li> <li>• Remove low count (genes = 10761)</li> <li>• Normalization using Trimmed Means method (TMM)</li> <li>• Transformed to counts per million (CPM)</li> </ul> <p><b>Data Analysis:</b></p> <ul style="list-style-type: none"> <li>• To_HS vs. To_TN</li> <li>• Su_HS vs. Su_TN</li> <li>• To_HS vs. Su_HS</li> <li>• To_TN vs. Su_TN</li> </ul> <p><b>Gene Annotation:</b></p> <ul style="list-style-type: none"> <li>• KEGG pathway mapping</li> <li>• GO term enrichment analysis</li> </ul> | <p><b>Data Processing:</b></p> <ul style="list-style-type: none"> <li>• Raw count (genes = 25880)</li> <li>• Remove low count (genes = 10761)</li> <li>• Normalization using Trimmed Means method (TMM)</li> <li>• Transformed to reads per kilobase of transcripts per million-mapped (RPKM)</li> <li>• Transformed to log2</li> </ul> <p><b>Data Analysis:</b></p> <ul style="list-style-type: none"> <li>• Module detection within To_HS</li> <li>• Module detection within Su_HS</li> <li>• Correlation with semen quality parameters</li> </ul> <p><b>Gene Annotation:</b></p> <ul style="list-style-type: none"> <li>• KEGG pathway mapping</li> <li>• GO term enrichment analysis</li> </ul> |
| <b>Results</b>                                                                                                                                                                                                                                                                                                                                                                                                                                                                                                                                                                                         |                                                                                                                                                                                                                                                                                                                                                                                                                                                                                                                                                                                                                                                                                                     |
| <ul style="list-style-type: none"> <li>• Differentially expressed genes (DEGs)</li> <li>• Network modules with hub genes</li> <li>• Relationships between modules and semen quality parameters</li> <li>• Functional enrichment terms of DEGs and genes within modules</li> <li>• KEGG pathways associated with DEGs and genes within modules</li> </ul>                                                                                                                                                                                                                                               |                                                                                                                                                                                                                                                                                                                                                                                                                                                                                                                                                                                                                                                                                                     |
