# Supplementary material for: Transcriptome analysis identifies genes and co-expression networks underlying heat tolerance in pigs
Source: PubMed Central journal article supplement (PMC7171765; doi:10.1186/s12863-020-00852-4), 2020-04-21

**A**

**Heat Stress: Heat-Tolerant Pigs**

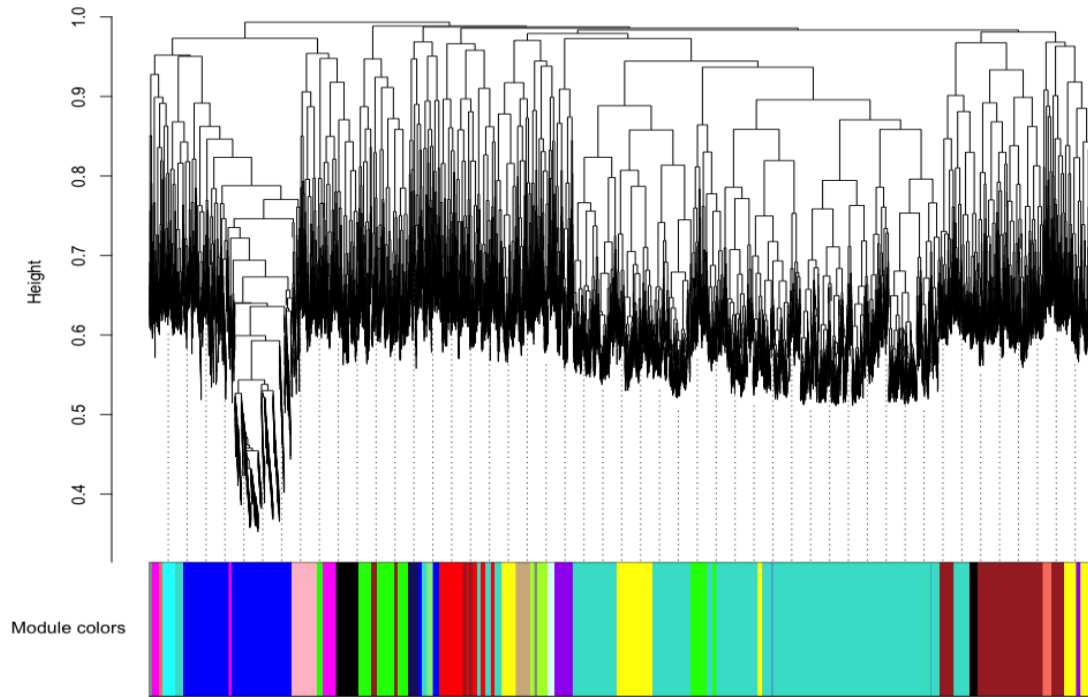

**B**

**Heat Stress: Heat-Susceptible Pigs**

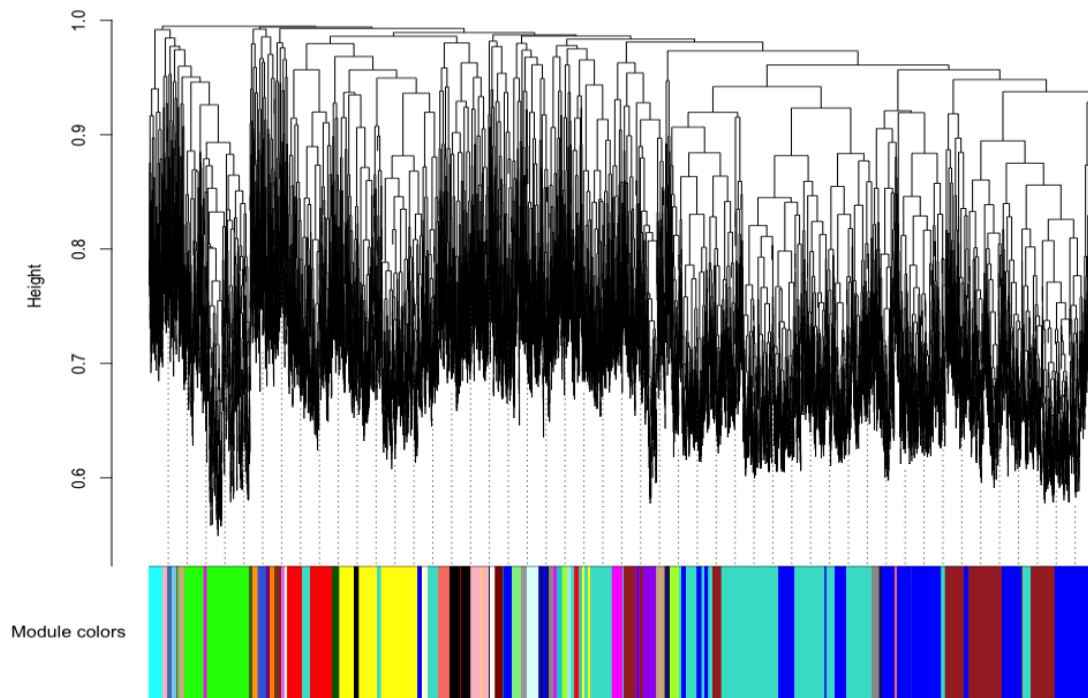

Supplement: 12863_2020_852_MOESM2_ESM.pdf [file 12863_2020_852_MOESM2_ESM.pdf]
