# Supplementary material for: Transcriptome analysis identifies genes and co-expression networks underlying heat tolerance in pigs
Source: PubMed Central journal article supplement (PMC7171765; doi:10.1186/s12863-020-00852-4), 2020-04-21
Supplement: 12863_2020_852_MOESM3_ESM.pdf [file 12863_2020_852_MOESM3_ESM.pdf]

**A**

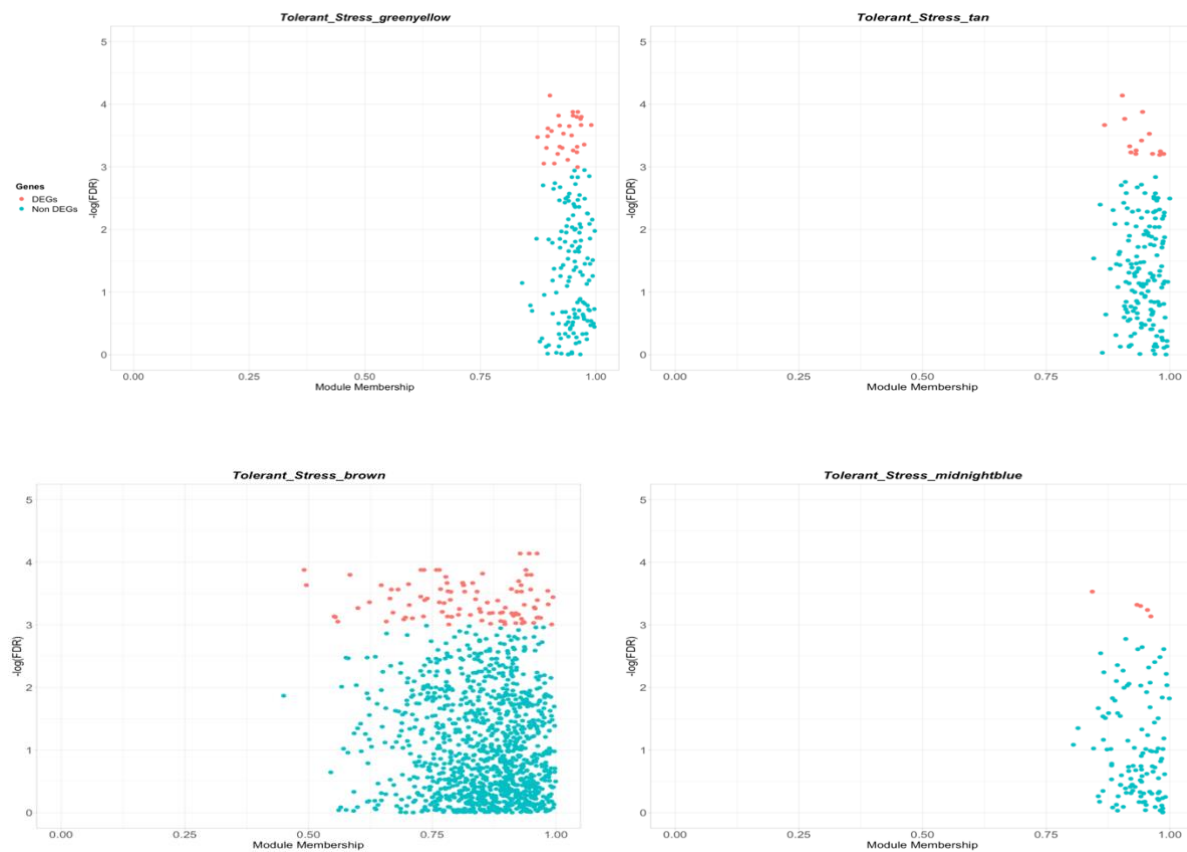

**B**

| Module       | Semen Parameter   | Correlation | P-value | Genes | DEGs |
|--------------|-------------------|-------------|---------|-------|------|
| Greenyellow  | Total Sperm       | -0.88       | 0.05    | 168   | 30   |
| Tan          | Motility          | 0.88        | 0.05    | 167   | 14   |
| Midnightblue | Normal Morphology | -0.93       | 0.02    | 120   | 5    |
|              | Droplets          | 0.93        | 0.02    |       |      |
| Brown        | Reject Ejaculate  | -0.89       | 0.04    | 1234  | 98   |

C

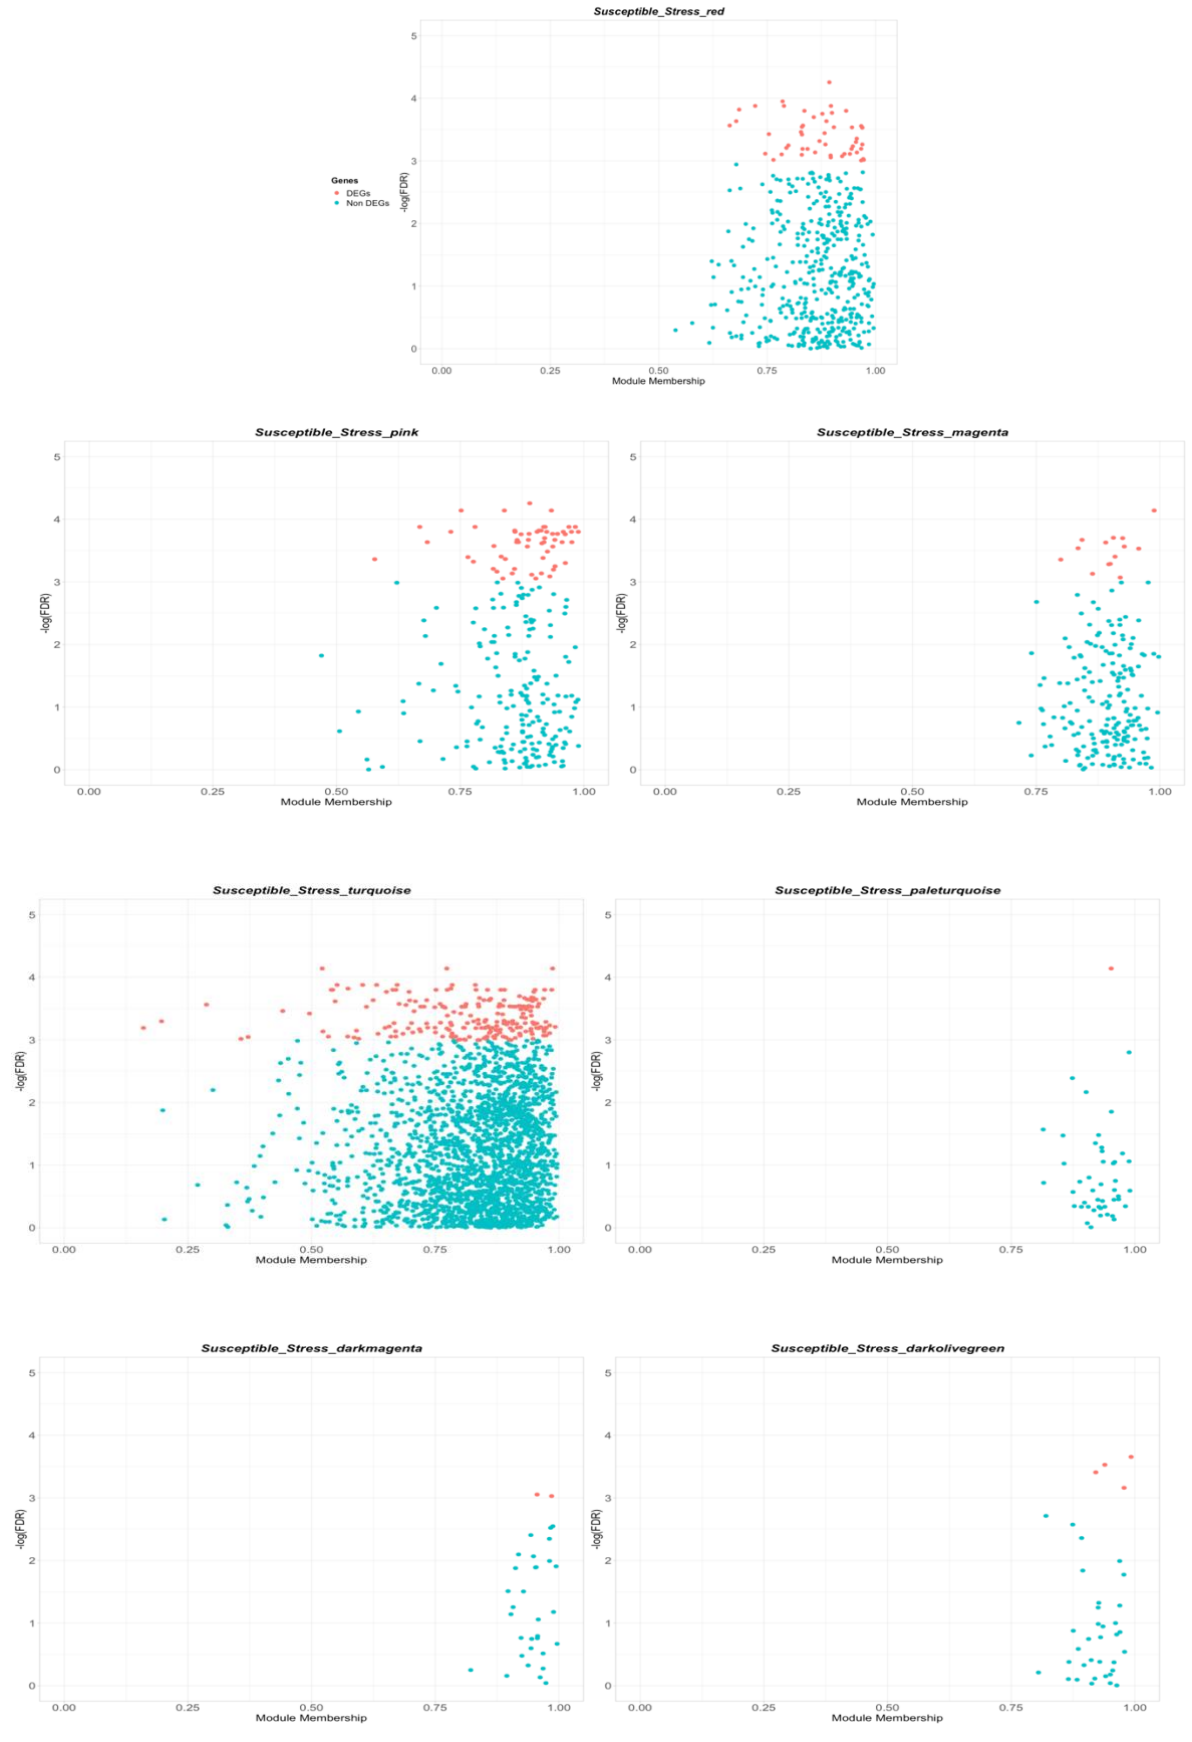

**D**

| <b>Module</b>  | <b>Semen Parameter</b> | <b>Correlation</b> | <b>P-value</b> | <b>Genes</b> | <b>DEGs</b> |
|----------------|------------------------|--------------------|----------------|--------------|-------------|
| Red            | Total Sperm            | 0.87               | 0.02           | 480          | 51          |
|                | Motility               | -0.84              | 0.04           |              |             |
| Pink           | Total Sperm            | -0.94              | 0.005          | 250          | 58          |
|                | Rejected Ejaculate     | 0.91               | 0.01           |              |             |
| Magenta        | Motility               | -0.88              | 0.02           | 199          | 14          |
| Turquoise      | Motility               | -0.86              | 0.03           | 2380         | 214         |
| Paleturquoise  | Normal Morphology      | 0.85               | 0.03           | 46           | 1           |
|                | Droplets               | -0.84              | 0.04           |              |             |
| Darkmagenta    | Normal Morphology      | 0.85               | 0.03           | 33           | 2           |
|                | Droplets               | -0.81              | 0.05           |              |             |
| Darkolivegreen | Normal Morphology      | 0.92               | 0.01           | 38           | 4           |
|                | Droplets               | -0.92              | 0.01           |              |             |
