# Supplementary material for: Transcriptome analysis identifies genes and co-expression networks underlying heat tolerance in pigs
Source: PubMed Central journal article supplement (PMC7171765; doi:10.1186/s12863-020-00852-4), 2020-04-21

**A**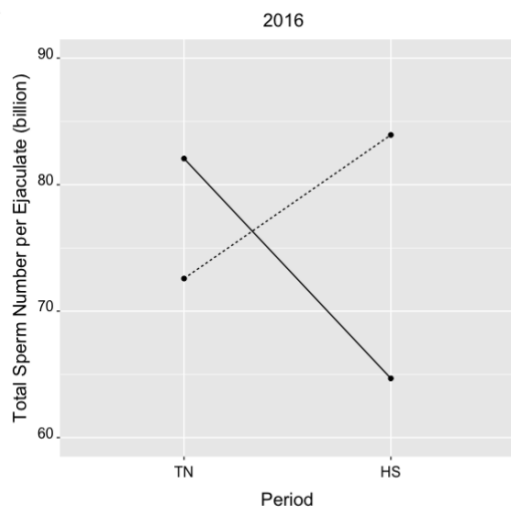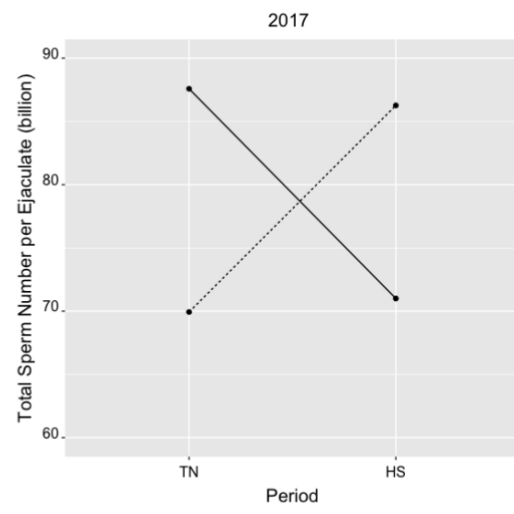**B**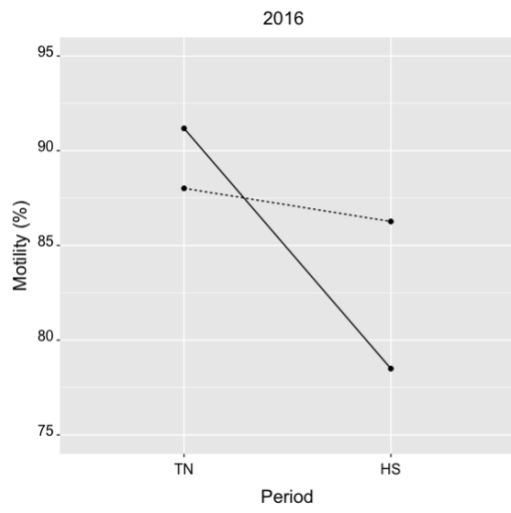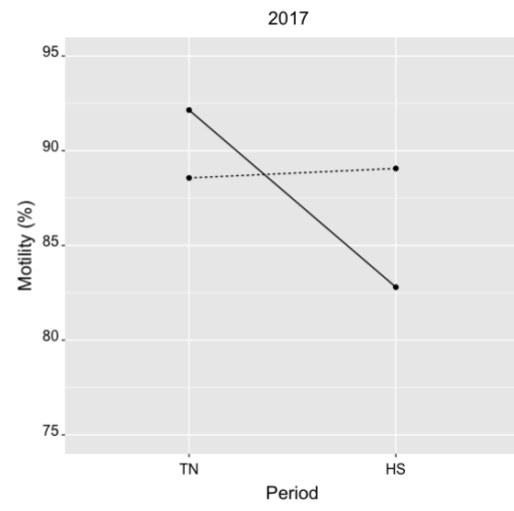

**C**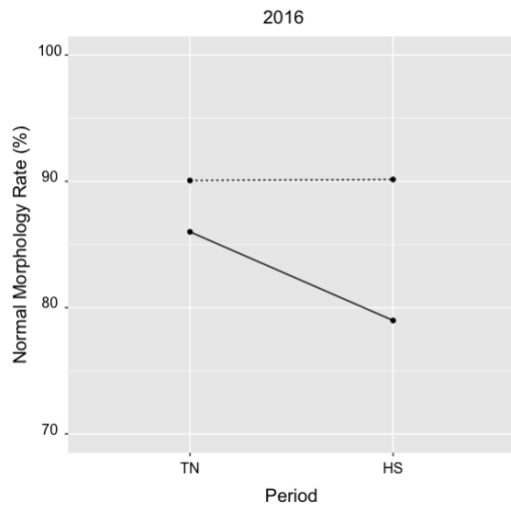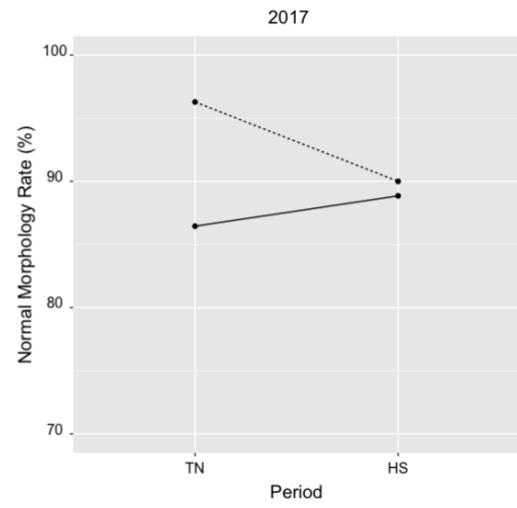**D**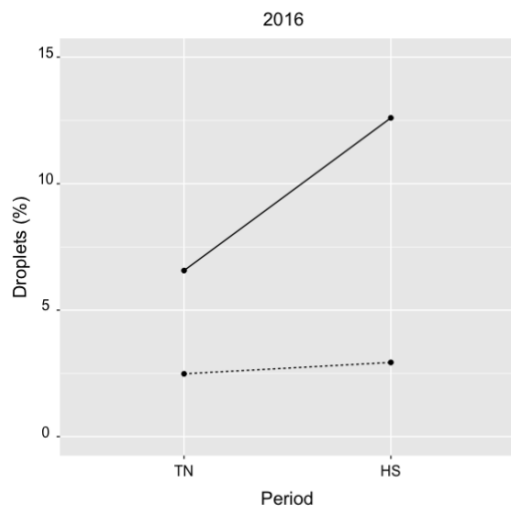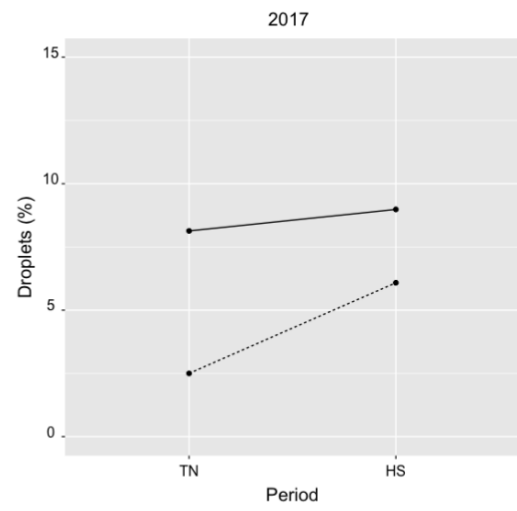**E**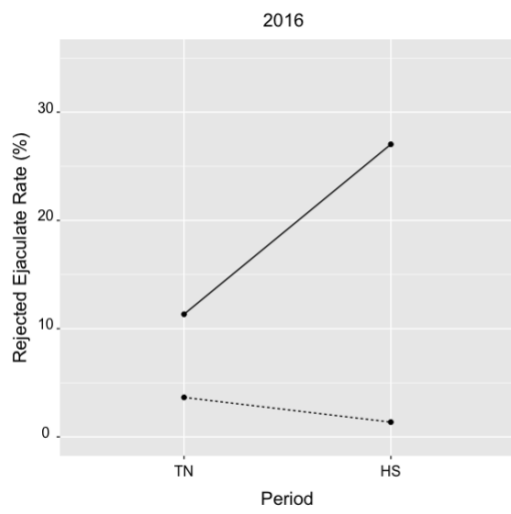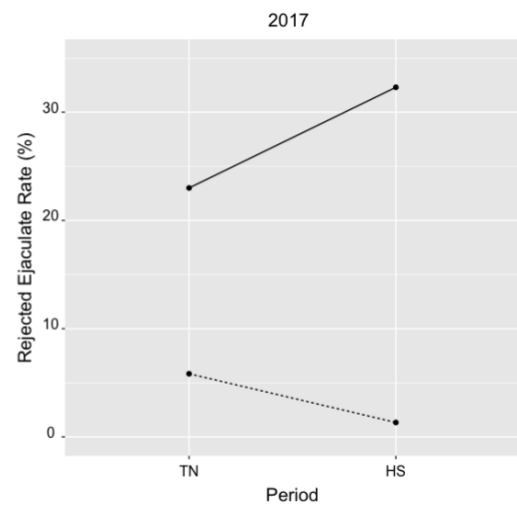

Supplement: 12863_2020_852_MOESM4_ESM.pdf [file 12863_2020_852_MOESM4_ESM.pdf]
